# Supplementary material
Source: publisher figshare collection journal article supplement (https://acs.figshare.com/ndownloader/files/22616207)
Supplement: Supplementary file 1 [file 22616207]

## Supporting Information

### **1T'' Transition-Metal Dichalcogenides: Strong Bulk Photovoltaic Effect for Enhanced Solar-Power Harvesting**

Haoqiang Ai,<sup>a</sup> Youchao Kong,<sup>b</sup> Di Liu,<sup>b</sup> Feifei Li,<sup>b</sup> Jiazhong Geng,<sup>b</sup> Shuangpeng Wang<sup>b,c</sup>, Kin Ho Lo,<sup>\*a</sup> and Hui Pan<sup>\*b, c</sup>

*<sup>a</sup>Department of Electromechanical Engineering, Faculty of Science and Technology, University of Macau, Macao SAR, 999078, P. R. China*

*<sup>b</sup>Institute of Applied Physics and Materials Engineering, University of Macau, Macao SAR, 999078, P. R. China*

*<sup>c</sup>Department of Physics and Chemistry, Faculty of Science and Technology, University of Macau, Macao SAR, 999078, P. R. China*

\*Email: [fstkhl@um.edu.mo](mailto:fstkhl@um.edu.mo). (K. H. L.)

\*Email: [huipan@um.edu.mo](mailto:huipan@um.edu.mo); Tel.: 853-88224427; Fax: 853-88222454. (H. P.)

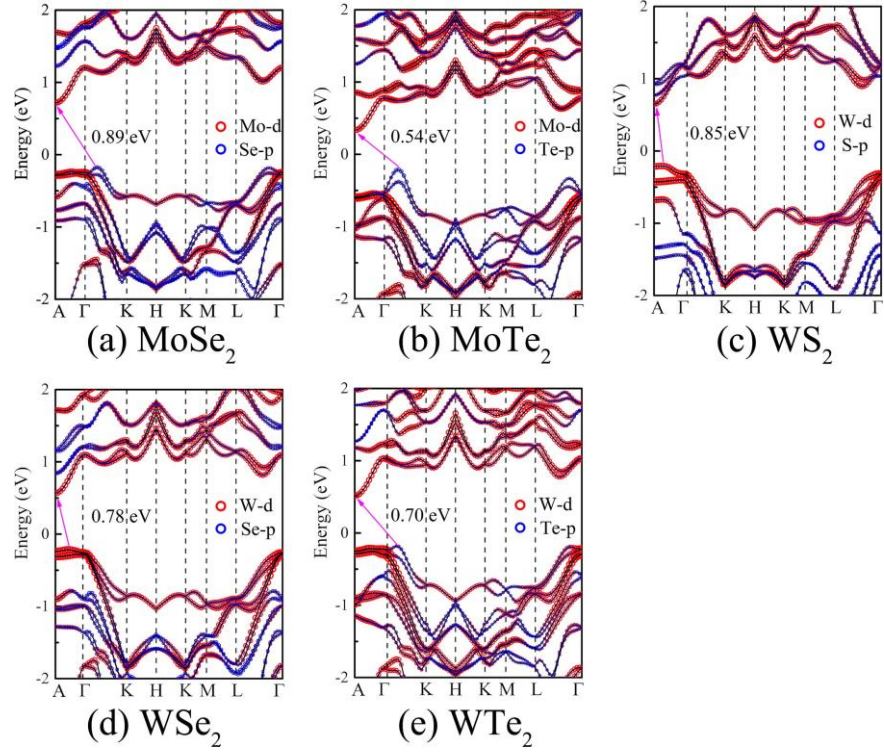

Figure S1. Orbital-resolved band structures based on HSE06 + SOC for 1T'' bulks: (a)  $\text{MoSe}_2$ , (b)  $\text{MoTe}_2$ , (c)  $\text{WS}_2$ , (d)  $\text{WSe}_2$  and (e)  $\text{WTe}_2$ . The Fermi level is at 0 eV.

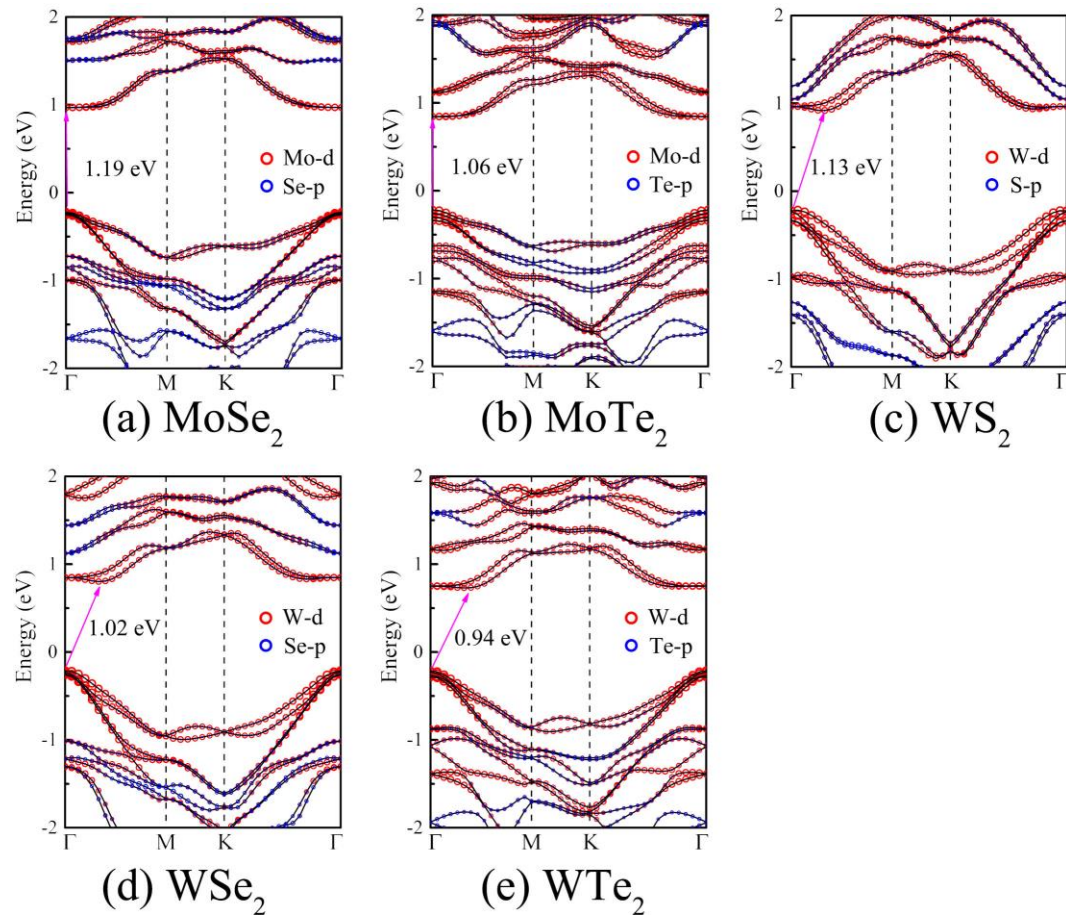

Figure S2. Orbital-resolved band structures based on HSE06 + SOC for 1T'' monolayers: (a) MoSe<sub>2</sub>, (b) MoTe<sub>2</sub>, (c) WS<sub>2</sub>, (d) WSe<sub>2</sub> and (e) WTe<sub>2</sub>. The Fermi level is at 0 eV.

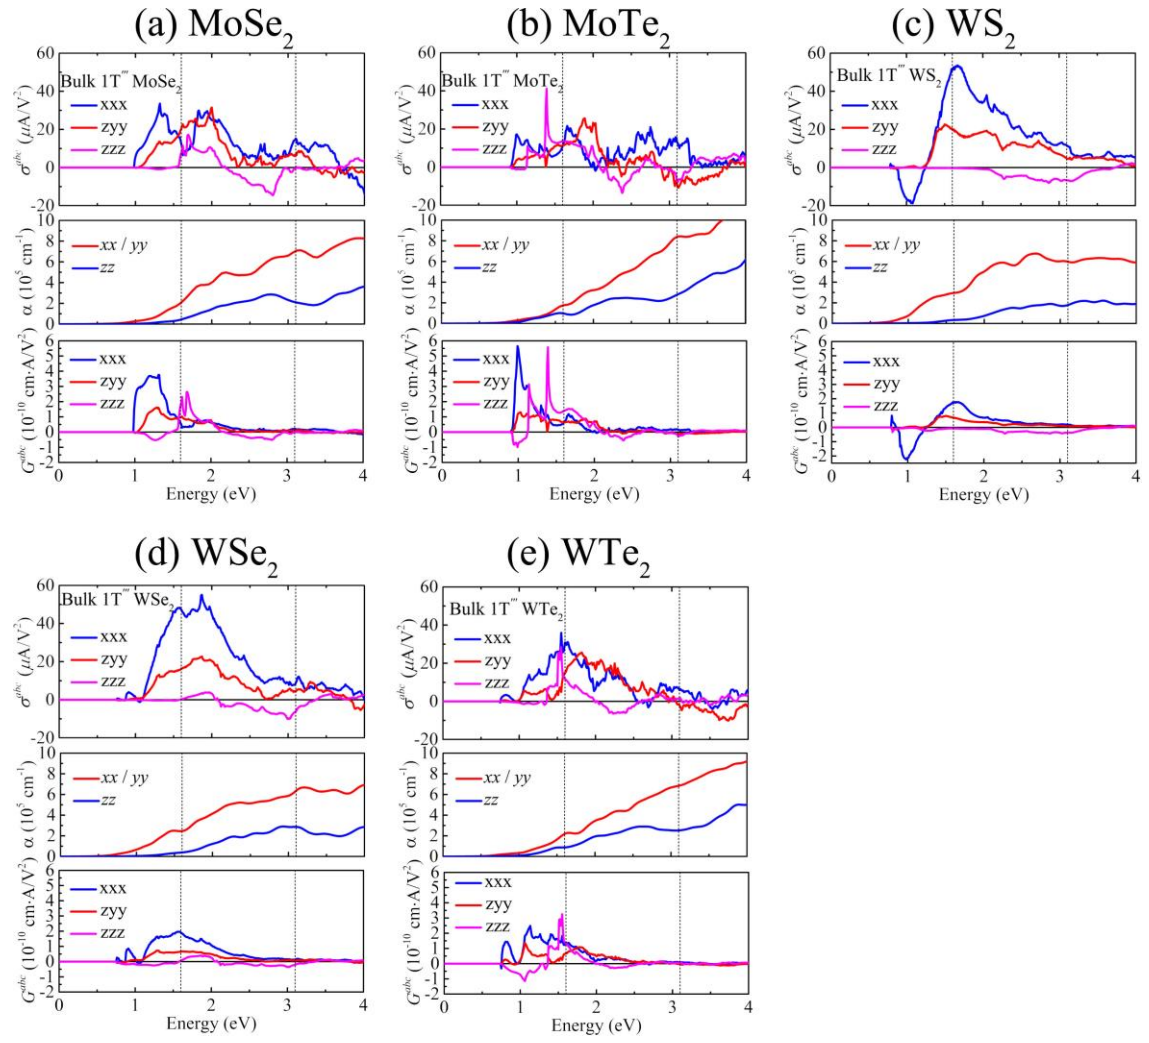

Figure S3. The shift-current responses ( $\sigma^{abc}$ ), the optical absorption coefficients ( $\alpha$ ) and the Glass coefficient responses ( $G^{abc}$ ) of the 1T'' bulk (a) MoSe<sub>2</sub>, (b) MoTe<sub>2</sub>, (c) WS<sub>2</sub>, (d) WSe<sub>2</sub> and (e) WTe<sub>2</sub>. The visible light region (1.6–3.1 eV) is within the range of the two dashed lines.

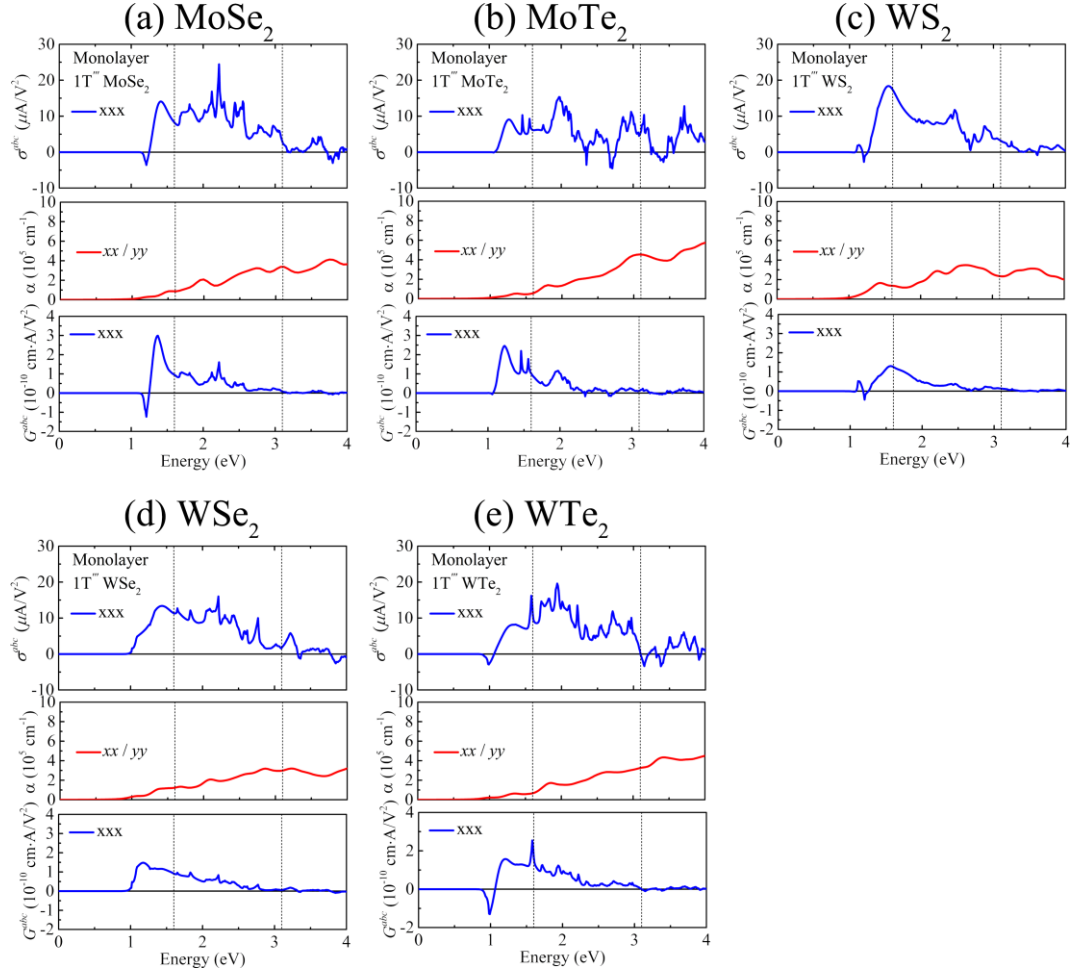

Figure S4. The shift-current responses ( $\sigma^{abc}$ ), the optical absorption coefficients ( $\alpha$ ) and the Glass coefficient responses ( $G^{abc}$ ) of the 1T' monolayer (a) MoSe<sub>2</sub>, (b) MoTe<sub>2</sub>, (c) WS<sub>2</sub>, (d) WSe<sub>2</sub> and (e) WTe<sub>2</sub>. The visible light region (1.6–3.1 eV) is within the range of the two dashed lines.

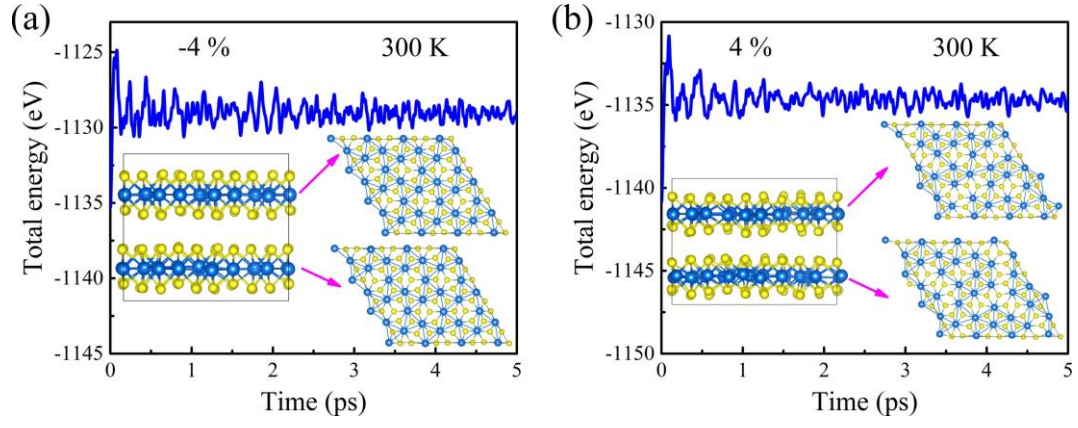

Figure S5. The fluctuation of the total energy of 1T'-MoS<sub>2</sub>-b under the in-plane strain of (a) -4% and (b) 4% during the AIMD simulations at a temperature of 300 K. The insets show the structural snapshots of 1T'-MoS<sub>2</sub>-b at the equilibrium state under 300 K.
